# Supplementary material for: Optimization of the surface properties of nanostructured Ni–W alloys on steel by a mixed silane layer
Source: Royal Society of Chemistry journal article supplement (doi:10.1039/c5cp01895a), 2015-01-01
Supplement: c5cp01895a1.pdf [file c5cp01895a1.pdf]

## Supporting Information

# Optimization of the surface properties of nanostructured Ni–W alloys on steel by a mixed silane layer

M.P. Quiroga Argañaraz<sup>1</sup>, J. M. Ramallo-López<sup>1</sup>, G. Benítez<sup>1</sup>, A. Rubert<sup>1</sup>, E.D. Prieto<sup>1</sup>,  
L.M. Gassa<sup>1</sup>, R.C. Salvarezza<sup>1</sup>, M.E. Vela<sup>\*1</sup>

<sup>1</sup>Instituto de Investigaciones Fisicoquímicas Teóricas y Aplicadas (INIFTA), Universidad Nacional de La Plata - CONICET- Sucursal 4 Casilla de Correo 16, (1900) La Plata, Argentina.

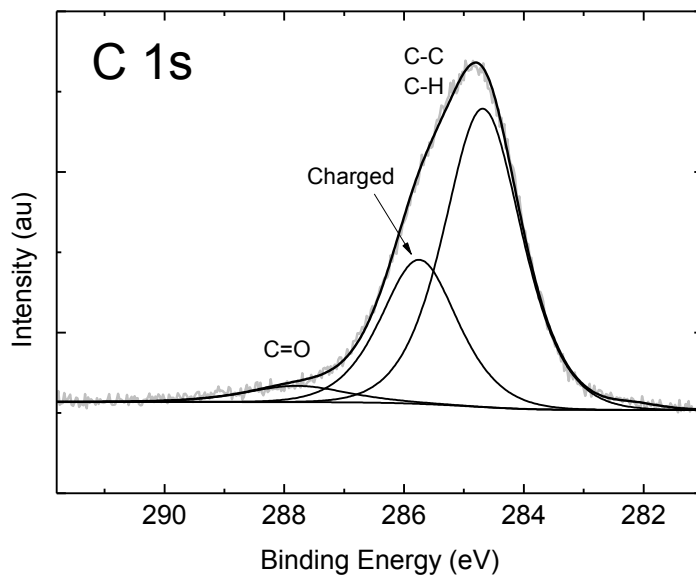

Figure S1. XPS spectra in the C 1s region for a TEOS&OTS Ni-W coating on steel.

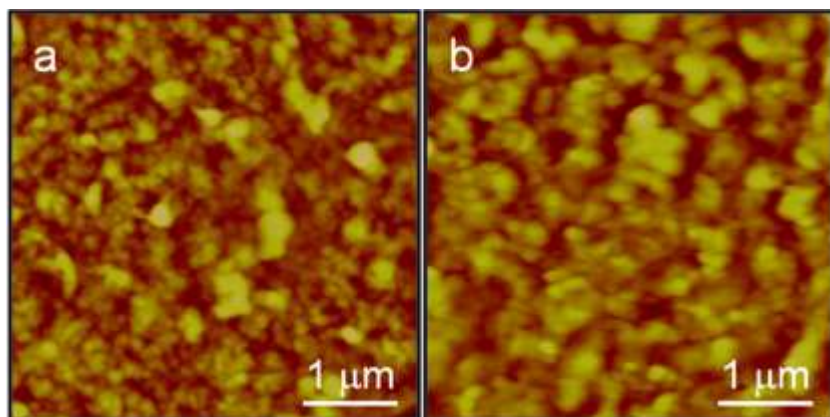

Figure S2.  $5\mu\text{m} \times 5\mu\text{m}$  AFM ex-situ images of a) Ni-W modified with TEOS&OTS, b) mica modified with TEOS&OTS following the same functionalization procedure as on Ni-W coatings. The  $z$  color scale is the same in both images where brighter colors correspond to higher  $z$  values.
